# Supplementary material for: Monoclonal Antibodies Targeting Surface-Exposed Epitopes of Candida albicans Cell Wall Proteins Confer In Vivo Protection in an Infection Model
Source: PubMed Central journal article supplement (PMC9017365; doi:10.1128/aac.01957-21), 2022-03-14
Supplement: aac.01957-21-s0001.pdf [file aac.01957-21-s0001.pdf]

1 Supplementary Materials for  
2 **Monoclonal antibodies targeting surface exposed epitopes of *Candida albicans***  
3 **cell wall proteins confer *in vivo* protection in an infection model**

4 Palliyil et al

5 Corresponding authors: Soumya Palliyil, soumya.palliyil@abdn.ac.uk, Carol A Munro,

6 c.a.munro@abdn.ac.uk

7

8 LIST OF SUPPLEMENTARY MATERIALS

9 Figure S1

10 Table S1

11 A

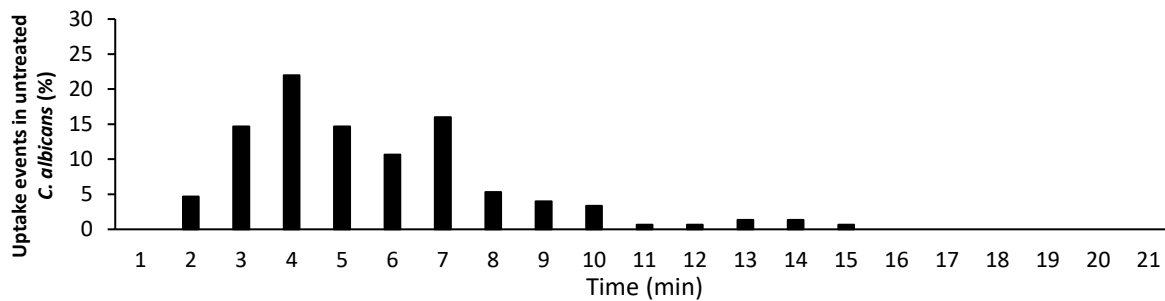

12

13 B

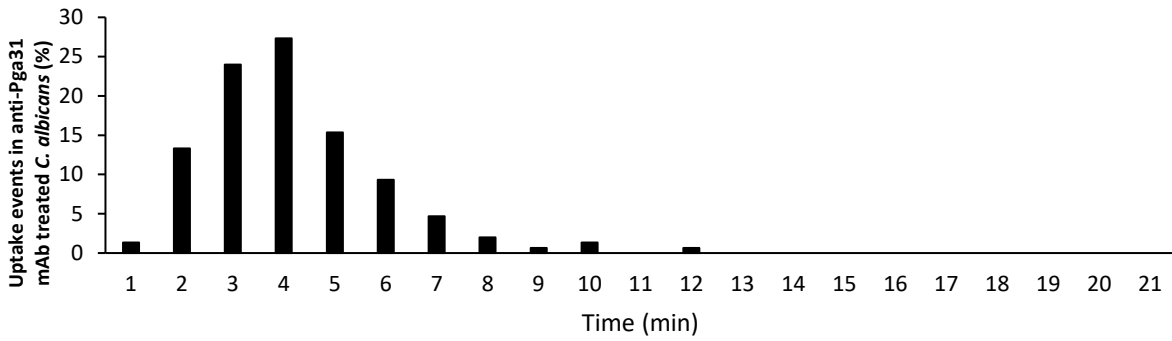

14

15 C

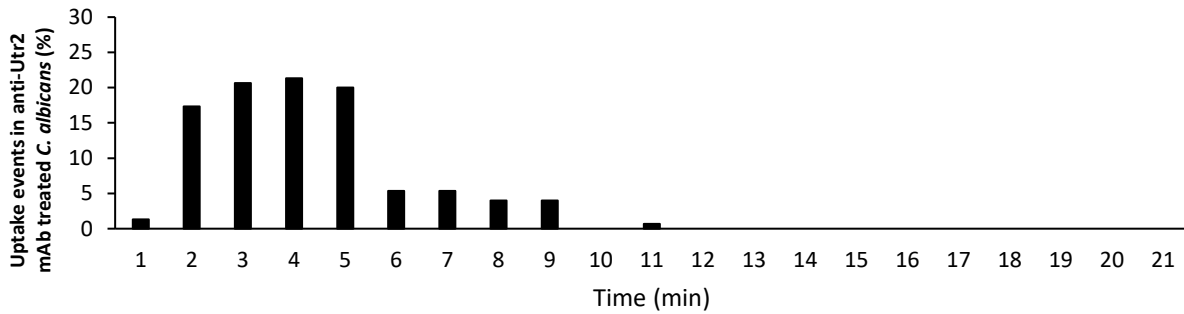

16

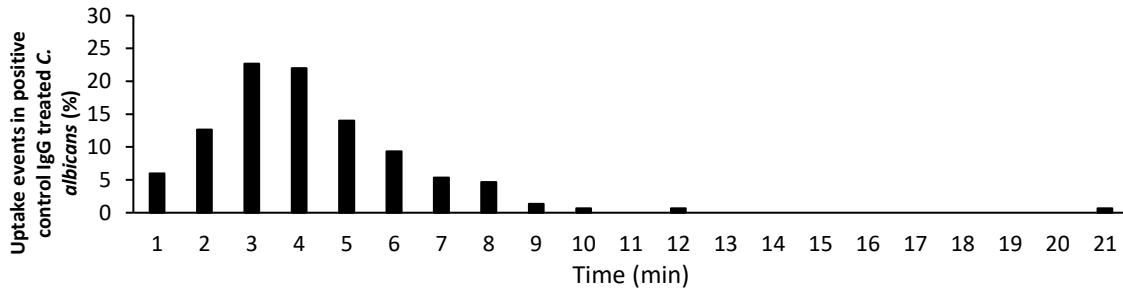

17 D

18

19 **Fig. S1. Engulfment of anti-Candida mAb treated C. albicans cells by mouse macrophages.**

20 *The time taken for J774.1 macrophages to ingest live Candida cells following initial cell-cell*

21 *contact verses the percentage of uptake events are plotted. (A) wt (B) Pga31 mAb (C) Utr2 mAb*

22 *(D) positive control murine mAb. The rate of engulfment of all antibody-treated cells was faster*

23 *than that of untreated C. albicans. Bars represent the percentages of uptake events (n = 6 videos*

24 *for each antibody group from two biological replicates).*

25

26

| Treatment group | Mean ( $\pm$ SD) change in body weight |
|-----------------|----------------------------------------|
| Isotype Control | -13.77 $\pm$ 3.00                      |
| Pga31 mAb       | -9.49 $\pm$ 2.56                       |
| Utr2 mAb        | -10.79 $\pm$ 1.80                      |
| Saline only     | -11.59 $\pm$ 2.89                      |

27

28 **Table S1. Average weight change in mice in study 1** Groups of mice (n=6) were treated with  
29 either Pga31 mAb (15 mg/kg), Utr2 mAb (15 mg/kg), mouse IgG2a isotype control (15 mg/kg) or  
30 saline, 3 h pre and 24 h post-infection in a murine model of disseminated candidiasis. Data  
31 represents mean change in body weight  $\pm$ SD (g) at day 2 compared with day 0 in mouse study 1.

32

33

34

35

36
